# Supplementary material for: Interaction of BODIPY dyes with bovine serum albumin: a case study on the aggregation of a click-BODIPY dye
Source: Royal Society of Chemistry journal article supplement (doi:10.1039/c6cp00420b), 2016-01-01
Supplement: c6cp00420b1.pdf [file c6cp00420b1.pdf]

## SUPPORTING INFORMATION

### INTERACTION OF BODIPY DYES WITH BOVINE SERUM ALBUMIN: A CASE STUDY ON THE AGGREGATION OF A CLICK-BODIPY DYE

Laramie P. Jameson,<sup>a</sup> Nicholas W. Smith,<sup>a</sup> Onofrio Annunziata,<sup>a</sup> and Sergei V. Dzyuba<sup>\*a</sup>

<sup>a</sup> *Department of Chemistry and Biochemistry, Texas Christian University, Fort Worth, TX 76129, USA.*

*Fax: +1 817 257 5851; Tel: +1 817 257 6218; E-mail: s.dzyuba@tcu.edu*

#### TABLE OF CONTENTS

|                                                                                       |    |
|---------------------------------------------------------------------------------------|----|
| Materials and methods.....                                                            | 2  |
| Synthesis and characterization BODIPY and click-BODIPY dyes.....                      | 3  |
| <sup>1</sup> H NMR spectrum of dye <b>1</b> .....                                     | 4  |
| <sup>1</sup> H NMR spectrum of dye <b>2</b> .....                                     | 5  |
| <sup>1</sup> H NMR spectrum of dye <b>3</b> .....                                     | 6  |
| Table S1 Quantum yields of dyes 1, 2 and 3 in the presence and absence of BSA.....    | 7  |
| Figure S1 Absorption and emission spectra of dye <b>1</b> in buffer.....              | 8  |
| Figure S2 Absorption and emission spectra of dye <b>2</b> in buffer.....              | 9  |
| Figure S3 Absorption and emission spectra of dye <b>3</b> in buffer.....              | 10 |
| Figure S4 Absorption and emission spectra of dye <b>1</b> in the presence of BSA..... | 11 |
| Figure S5 Absorption and emission spectra of dye <b>2</b> in the presence of BSA..... | 12 |
| Figure S6 Absorption and emission spectra of dye <b>3</b> in the presence of BSA..... | 13 |
| References.....                                                                       | 14 |

## Materials and methods

All reagents and solvents were purchased from commercial sources (Sigma-Aldrich, Acros, Alfa, Aesar) and were used as received. NMR spectra were recorded on a Varian (300 MHz) or Bruker (400 MHz) spectrometers.  $^1\text{H}$  NMR chemical shifts are reported in ppm ( $\delta$ ) downfield from residual  $\text{CDCl}_3$ .

Absorbance and fluorescence measurements were performed on Agilent 8453 UV-visible instrument and Shimadzu RF-5301PC, respectively, using 1 cm quartz cells with a resolution of 1 nm at room temperature (20 °C). Fluorescence measurements were carried out as follows: excitation and emission width slits were 3 nm and 3 nm; intensity – high or low; samples were excited either at 475 nm or the absorption maximum, and the obtained spectra were smoothed using manufacture provided software.

Milli-Q-system was used to purify water that was utilized throughout this work. Stock solutions of the dyes for spectroscopic measurements were prepared in EtOH (0.10 mM) and subsequently diluted into the aqueous buffer. Final EtOH concentration was < 1 % v/v.

Stock solutions of the dyes for spectroscopic measurements were prepared in EtOH (0.10 mM) and subsequently diluted into the aqueous buffer. The stock solution of BSA was prepared by dissolving a weighed amount of the lyophilized BSA (fatty-acid free preparation) in 10 mM TRIS buffer (0.1 M NaCl, pH 7.4); the concentration of BSA diluted solutions was determined spectroscopically using the extinction coefficient value of  $0.667 \text{ mg}^{-1} \text{ ml cm}^{-1}$ .<sup>1</sup> For the experiments described in Figure 4, BSA (96 mg) was dissolved in 3.28 ml of buffer solution (10 mM TRIS, 0.1 M NaCl, pH 7.4) and concentrated to 4.4 mM by filtration using amicon ultra-4 centrifugal filter (30 kDa membrane cut-off; Millipore) filter.

Relative quantum yields for BODIPY dyes were calculated according to the following equation:

$$\Phi_x = \Phi_s (A_s/A_x)(F_x/F_s) (n_x/n_s)^2$$

where  $\Phi_s$  – quantum yield of the standard; A – the absorbance (0.007 – 0.017 au range), F – the area under the emission curve, n – refractive index, the subscripts s and x are the standard and the unknown, respectively. For the quantum yield measurements, the dyes were excited at 475 nm, excitation and emission slits were both set at 3 nm. Dye 1 was used as a the standard ( $\Phi_s = 0.78$  in EtOH).<sup>5</sup>

## Synthesis and characterization of BODIPY and click-BODIPY dyes

BODIPY dyes **1**, **2** and **3** were prepared according to Scheme S1.

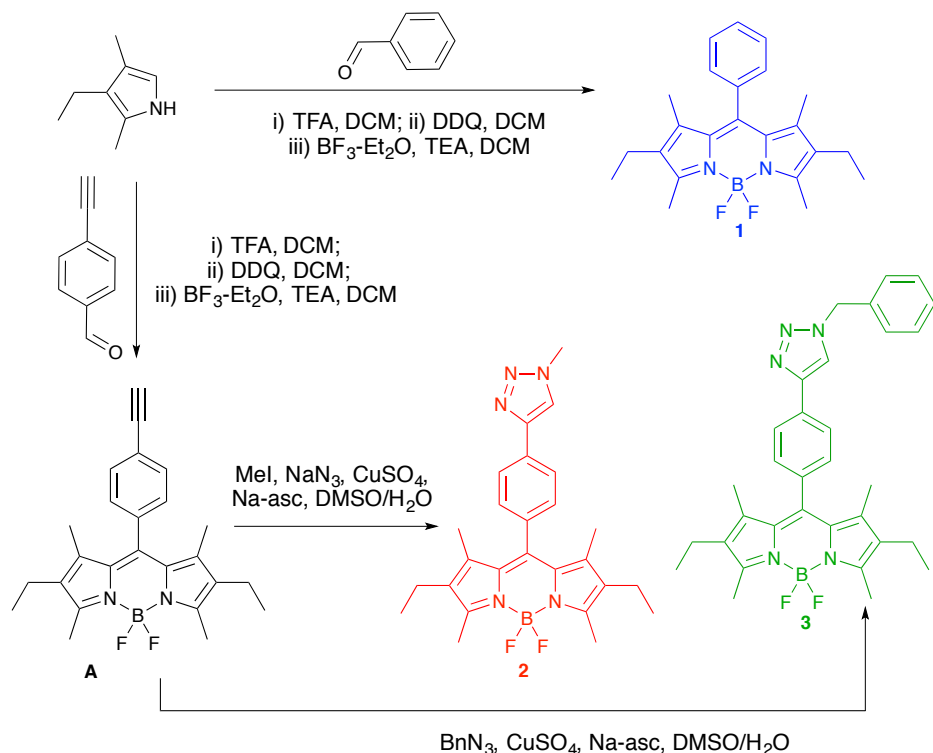

**Scheme S1.** Synthesis of BODIPY and click-BODIPY dyes

Dyes **1** and **3** were prepared according to literature procedures.<sup>2,3</sup>

Dye **2** was synthesized according to a modified literature procedure<sup>4</sup> as follows: a screw-cap vial that was subsequently charged with a stirring bar, DMSO (1.7 ml), alkyne-BODIPY **A** (52.4 mg, 0.129 mmol), L-proline (3.0 mg, 0.026 mmol),  $\text{NaN}_3$  (10.1 mg, 0.156 mmol),  $\text{Na}_2\text{CO}_3$  (2.8 mg, 0.026 mmol), sodium ascorbate (2.6 mg, 0.013 mmol). Next, water (0.17 ml) and MeI (8.0  $\mu\text{l}$ , 0.129 mmol) were added via syringe, followed by  $\text{CuSO}_4 \cdot 5\text{H}_2\text{O}$  (1.6 mg, 0.0065 mmol). The flask was capped, parafilm, wrapped in aluminum foil and placed in a 70°C oil bath under vigorous stirring overnight. Subsequently, the reaction mixture was diluted with  $\text{CH}_2\text{Cl}_2$  (20 ml) and extracted with water (2 x 10 ml), brine (10 ml), dilute  $\text{NH}_4\text{OH}$  (10 ml) and water (10 ml). The organic layer was dried over  $\text{MgSO}_4$ , and volatiles removed in vacuo. The residue was subjected to silica gel chromatography using EtOAc/hexane (1/1) followed by  $\text{CH}_2\text{Cl}_2$  as the eluent to give the dye **2** (12.1 mg; 20 % yield) as a dark red solid.  $^1\text{H}$  NMR (300 MHz,  $\text{CDCl}_3$ ):  $\delta$  = 7.96 (d,  $J$  = 8.5 Hz, 2H), 7.84 (s, 1H), 7.35 (d,  $J$  = 8.5 Hz, 2H), 4.19 (s, 3H), 2.53 (s, 6H), 2.30 (q,  $J$  = 7.6 Hz, 4H), 1.33 (s, 6H), 0.98 (t,  $J$  = 7.6 Hz, 6H);  $^{13}\text{C}$  NMR (75 MHz,  $\text{CDCl}_3$ ):  $\delta$  = 154.07, 147.66, 139.88, 138.57, 135.86, 133.07, 131.32, 130.95, 129.15, 126.47, 121.16, 37.11, 29.93, 17.31, 14.86, 12.13; HRMS (EI):  $[\text{M}]^+$   $m/z$  calcd for  $\text{C}_{26}\text{H}_{30}\text{BF}_2\text{N}_5$  461.2562, found 461.2559.

<sup>1</sup>H NMR spectra of dye 1  
 \* – H<sub>2</sub>O in CDCl<sub>3</sub>

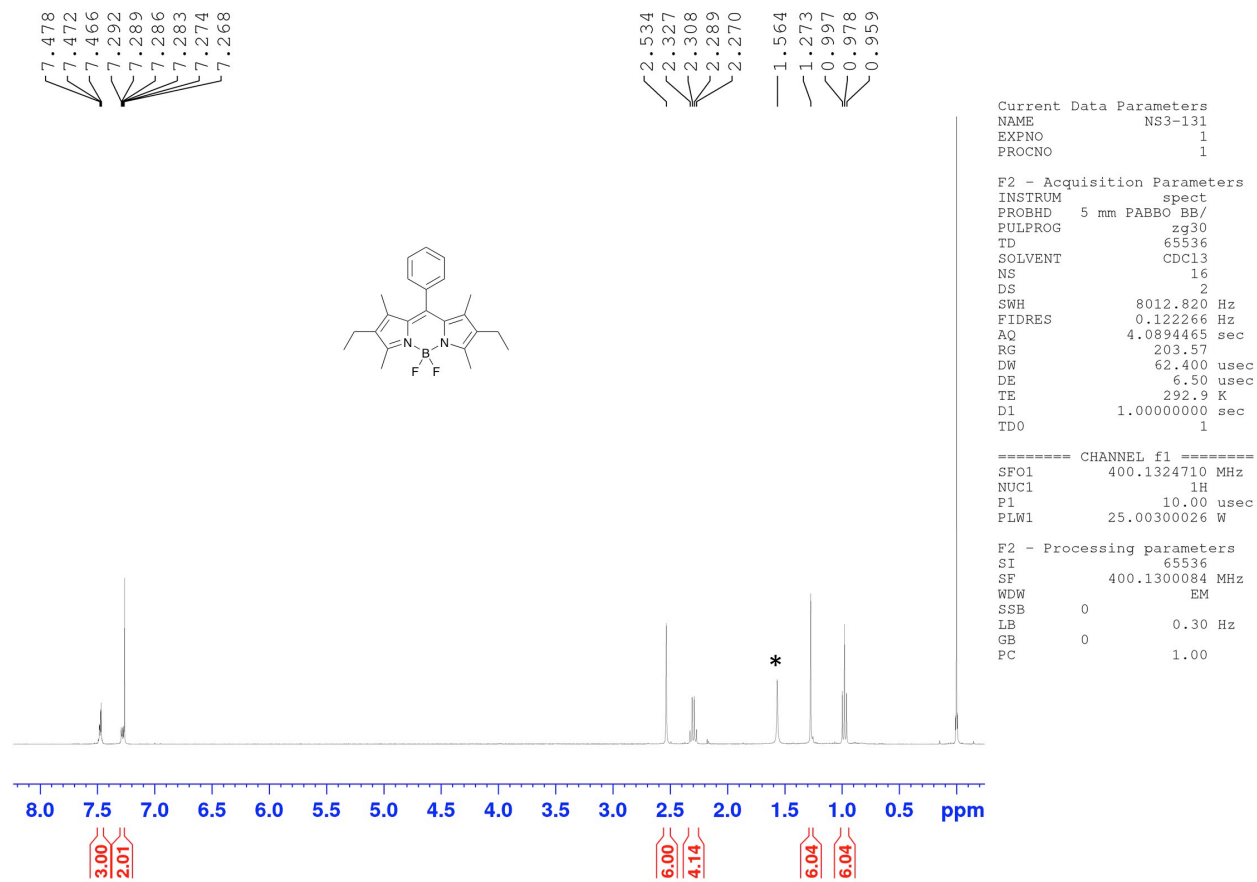

<sup>1</sup>H NMR spectra of dye 2  
 \* – H<sub>2</sub>O in CDCl<sub>3</sub>

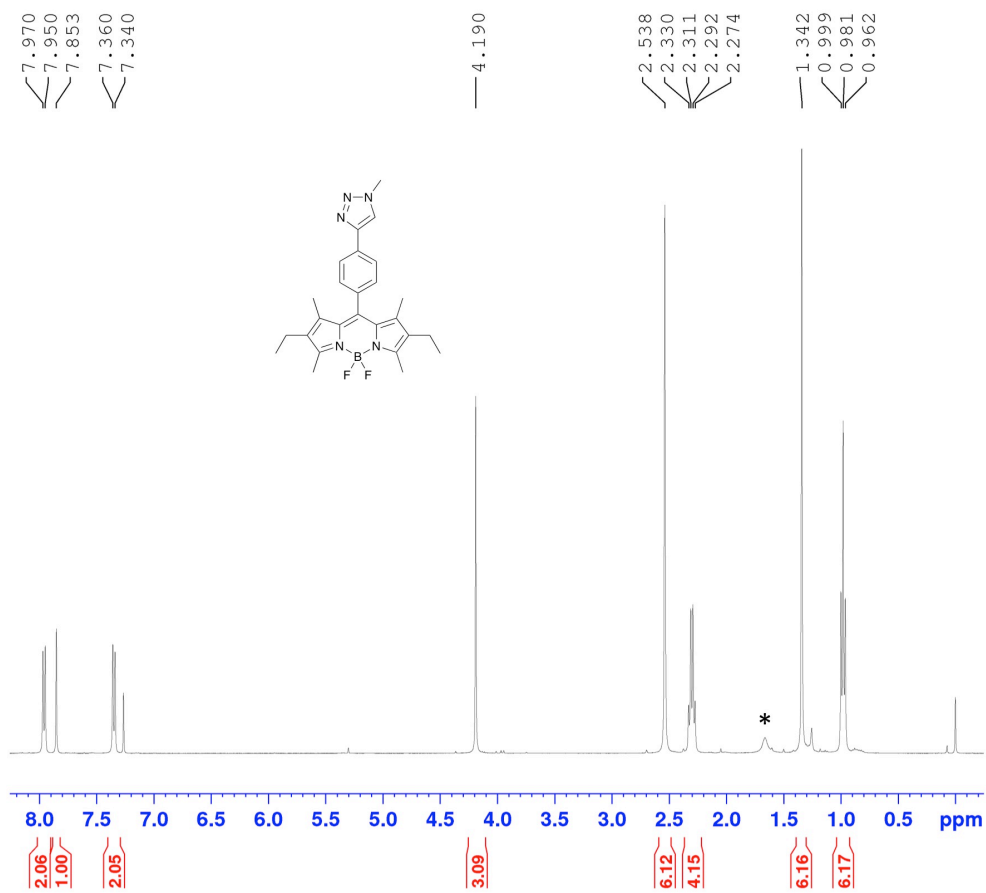

```

Current Data Parameters
NAME      42v dried
EXPNO     1
PROCNO    1

F2 - Acquisition Parameters
Date_     20160404
Time      9.03
INSTRUM   spect
PROBHD    5 mm PABBO BB/
PULPROG   zg30
TD         65536
SOLVENT   CDCl3
NS         16
DS         2
SWH        8012.820 Hz
FIDRES     0.122266 Hz
AQ         4.0894465 sec
RG         113.32
DW         62.400 usec
DE         6.50 usec
TE         292.9 K
D1         1.00000000 sec
TD0        1

===== CHANNEL f1 =====
SFO1      400.1324710 MHz
NUC1       1H
P1         10.00 usec
PLW1      25.00300026 W

F2 - Processing parameters
SI         65536
SF         400.1300073 MHz
WDW        EM
SSB        0
LB         0.30 Hz
GB         0
PC         1.00
  
```

<sup>1</sup>H NMR spectra of dye **3**  
 \* - H<sub>2</sub>O in CDCl<sub>3</sub>

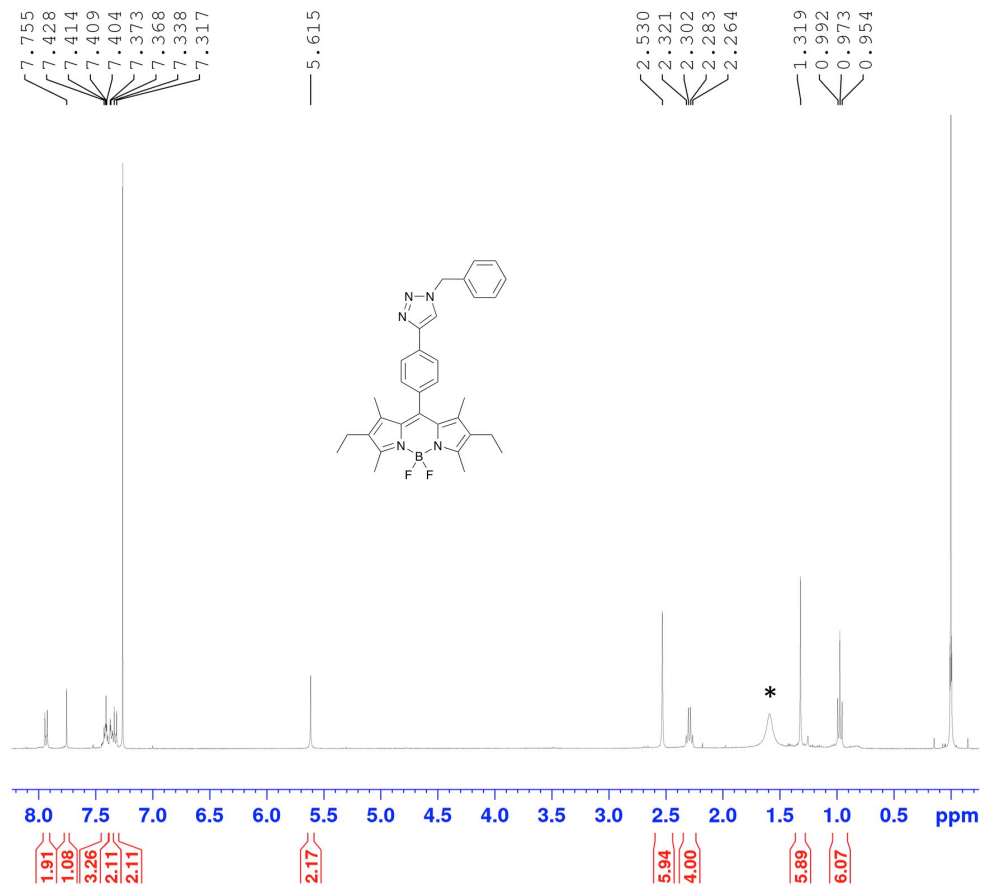

```

Current Data Parameters
NAME      NS2-93-2
EXPNO     1111
PROCNO    1

F2 - Acquisition Parameters
INSTRUM   spect
PROBHD    5 mm PABBO BB/
PULPROG   zg30
TD         65536
SOLVENT   CDCl3
NS         128
DS         2
SWH        8012.820 Hz
FIDRES     0.122266 Hz
AQ         4.0894465 sec
RG         32.38
DW         62.400 usec
DE         6.50 usec
TE         292.2 K
D1         1.00000000 sec
TDO        1

===== CHANNEL f1 =====
SF01      400.1324710 MHz
NUC1       1H
P1         10.00 usec
PLW1       25.00300026 W

F2 - Processing parameters
SI         65536
SF         400.1300084 MHz
WDW        EM
SSB        0
LB         0.30 Hz
GB         0
PC         1.00
  
```

**Table S1.** Quantum yields for dyes **1**, **2** and **3**, in the presence and absence of BSA.<sup>a</sup>

| dye                           | $\Phi$ |
|-------------------------------|--------|
| <b>1</b>                      | 0.17   |
| <b>2</b>                      | 0.35   |
| <b>3</b>                      | 0.03   |
| <b>1 + BSA<sup>b</sup></b>    | 0.48   |
| <b>2 + BSA<sup>b</sup></b>    | 0.53   |
| <b>3 + BSA<sup>b, c</sup></b> | 0.37   |

<sup>a</sup> – buffer: 10 mM TRIS buffer (0.1 M NaCl, pH 7.4), EtOH 0.1 % v/v.

<sup>b</sup> – [BSA] = 38  $\mu$ M

<sup>c</sup> – dye **3** and BSA were incubated for ca. 30 min, prior to the measurement, since fluorescence intensity of dye **3** increased with time (the phenomenon related to the kinetics of protein-dye association and the corresponding desolvation effects of the dye and its aggregates; see Figure 3 and the accompanying paragraphs in the main text).

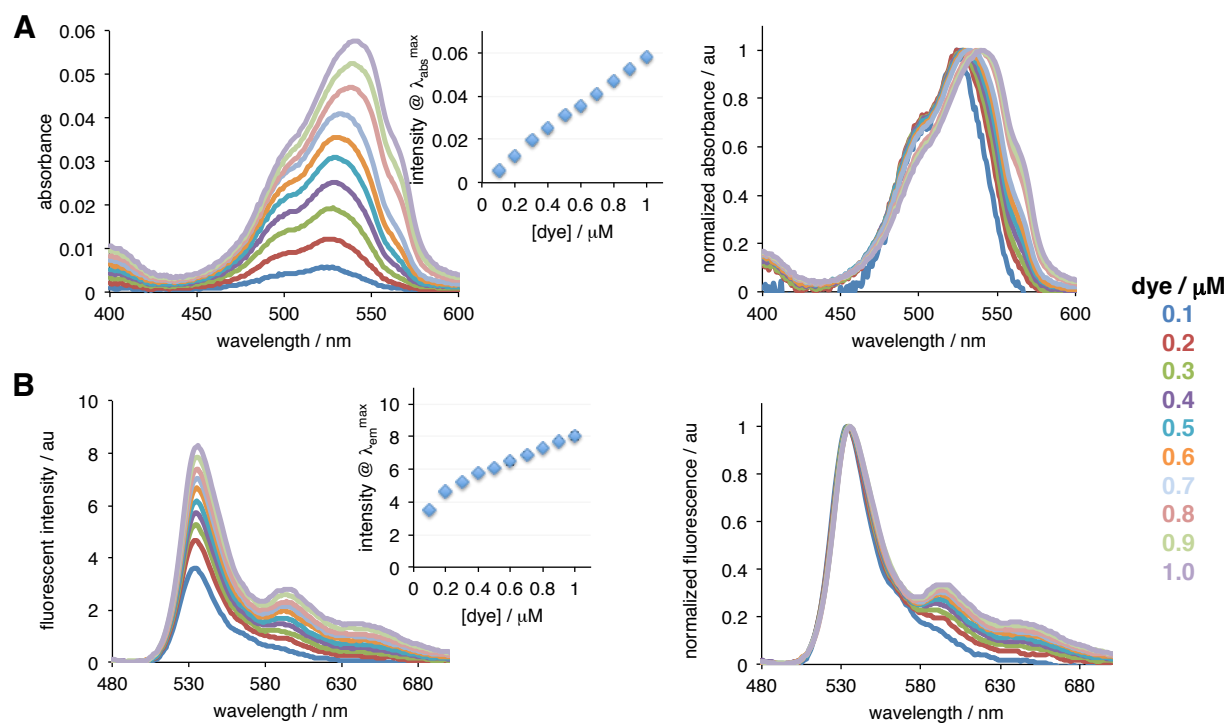

**Figure S1** Spectral properties of dye 1 in buffer

**A:** Absorption spectra as a function of dye's concentration (left) and normalized absorption spectra as a function of dye's concentration (right);

**B:** Emission spectra as a function dye's concentration;  $\lambda_{\text{ex}} = 475$  nm (left) and normalized emission spectra as a function of dye's concentration (right).

| [1] / $\mu\text{M}$ | $\lambda_{\text{abs}}^{\text{max}}$ / nm | $\lambda_{\text{em}}^{\text{max}}$ / nm |
|---------------------|------------------------------------------|-----------------------------------------|
| 0.1                 | 522                                      | 533                                     |
| 0.2                 | 525                                      | 534                                     |
| 0.3                 | 528                                      | 534                                     |
| 0.4                 | 529                                      | 535                                     |
| 0.5                 | 529                                      | 535                                     |
| 0.6                 | 529                                      | 535                                     |
| 0.7                 | 529                                      | 535                                     |
| 0.8                 | 538                                      | 535                                     |
| 0.9                 | 539                                      | 535                                     |
| 1.0                 | 540                                      | 536                                     |



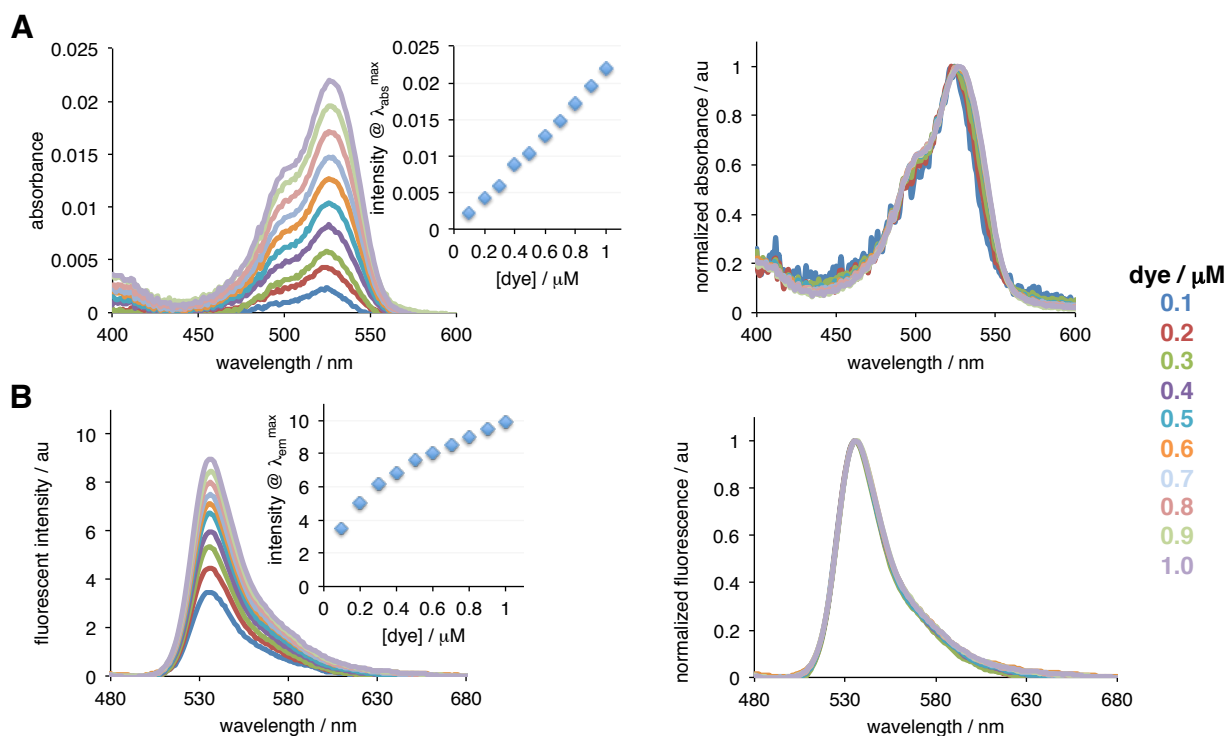

**Figure S2** Spectral properties of dye **2** in buffer

**A:** Absorption spectra as a function of dye's concentration (left) and normalized absorption spectra as a function of dye's concentration (right);

**B:** Emission spectra as a function dye's concentration;  $\lambda_{ex} = 475$  nm (left) and normalized emission spectra as a function of dye's concentration (right).

| [2] / $\mu\text{M}$ | $\lambda_{\text{abs}}^{\text{max}}$ / nm | $\lambda_{\text{em}}^{\text{max}}$ / nm |
|---------------------|------------------------------------------|-----------------------------------------|
| 0.1                 | 524                                      | 536                                     |
| 0.2                 | 522                                      | 536                                     |
| 0.3                 | 525                                      | 536                                     |
| 0.4                 | 526                                      | 536                                     |
| 0.5                 | 526                                      | 536                                     |
| 0.6                 | 526                                      | 536                                     |
| 0.7                 | 526                                      | 536                                     |
| 0.8                 | 526                                      | 536                                     |
| 0.9                 | 526                                      | 536                                     |
| 1.0                 | 526                                      | 536                                     |

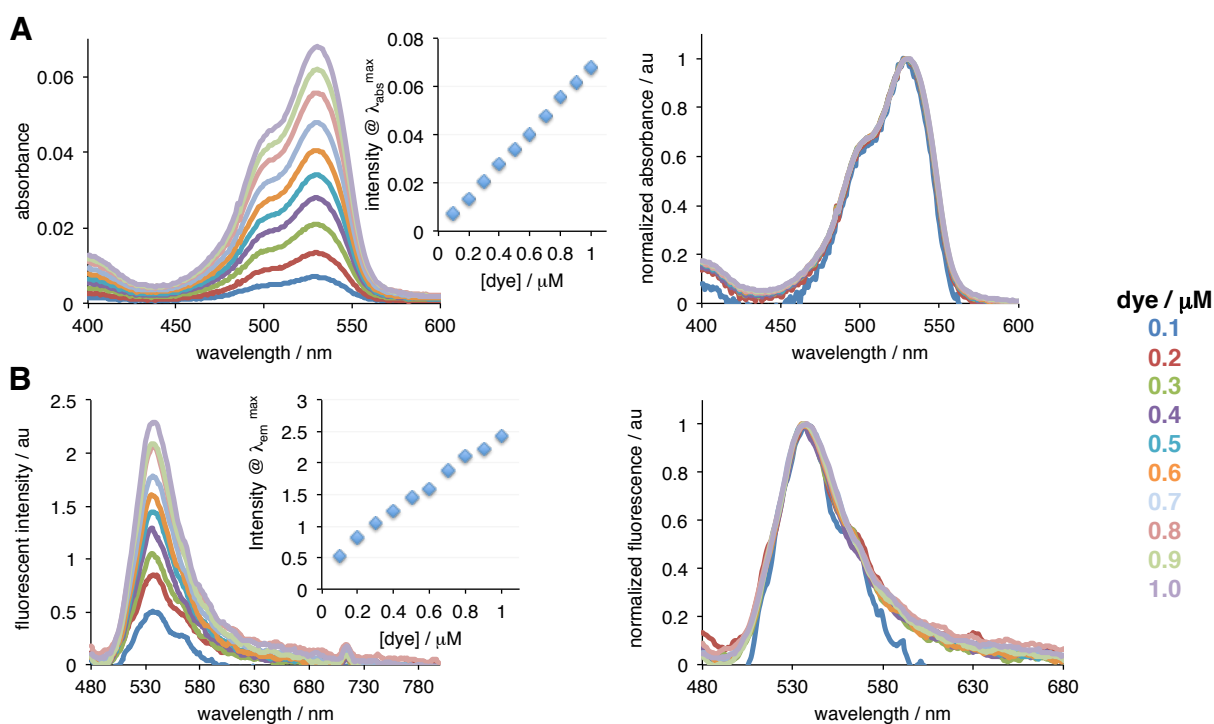

**Figure S3** Spectral properties of dye **3** in buffer

**A:** Absorption spectra as a function of dye's concentration (left) and normalized absorption spectra as a function of dye's concentration (right);

**B:** Emission spectra as a function dye's concentration;  $\lambda_{ex} = 475$  nm (left) and normalized emission spectra as a function of dye's concentration (right).

| [ <b>3</b> ] / $\mu\text{M}$ | $\lambda_{abs}^{max}$ / nm | $\lambda_{em}^{max}$ / nm |
|------------------------------|----------------------------|---------------------------|
| 0.1                          | 527                        | 536                       |
| 0.2                          | 529                        | 537                       |
| 0.3                          | 529                        | 536                       |
| 0.4                          | 529                        | 536                       |
| 0.5                          | 529                        | 535                       |
| 0.6                          | 529                        | 537                       |
| 0.7                          | 529                        | 537                       |
| 0.8                          | 530                        | 537                       |
| 0.9                          | 530                        | 536                       |
| 1.0                          | 530                        | 538                       |

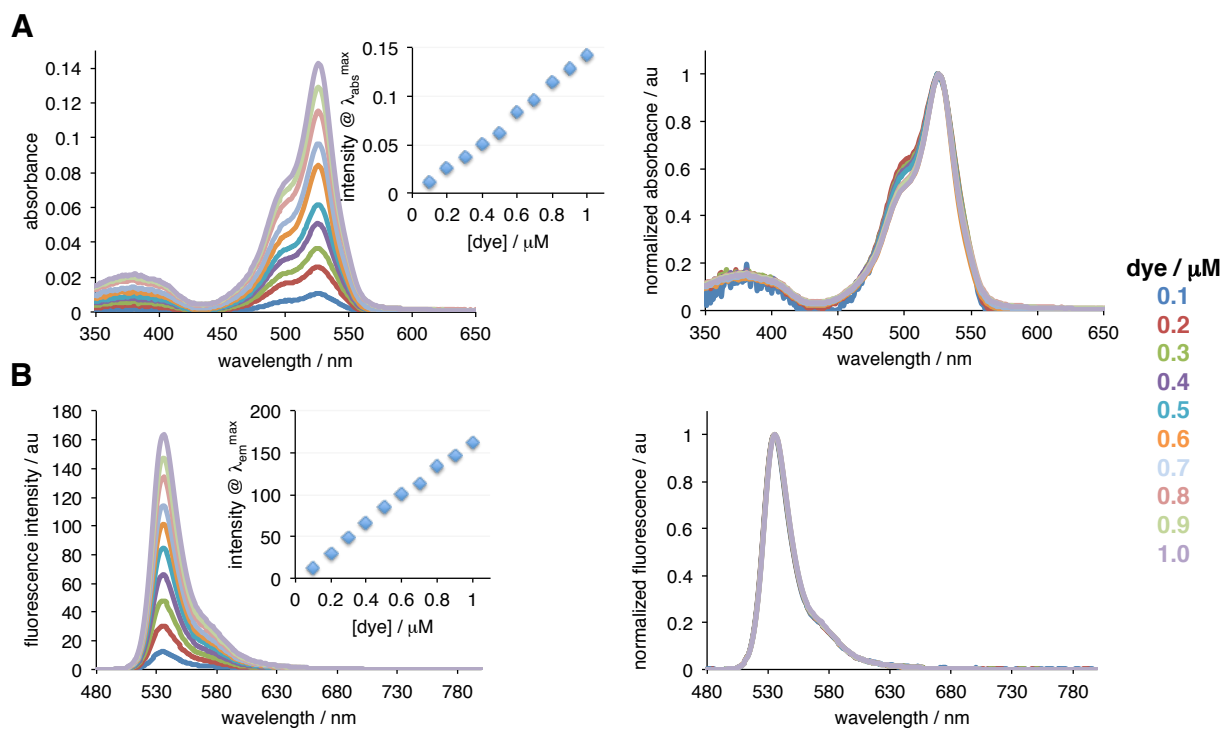

**Figure S4** Spectral properties of dye **1** in the presence of BSA.

[BSA] = 39  $\mu\text{M}$

**A:** Absorption spectra as a function of dye's concentration (left) and normalized absorption spectra as a function of dye's concentration (right);

**B:** Emission spectra as a function dye's concentration;  $\lambda_{\text{ex}} = 475 \text{ nm}$

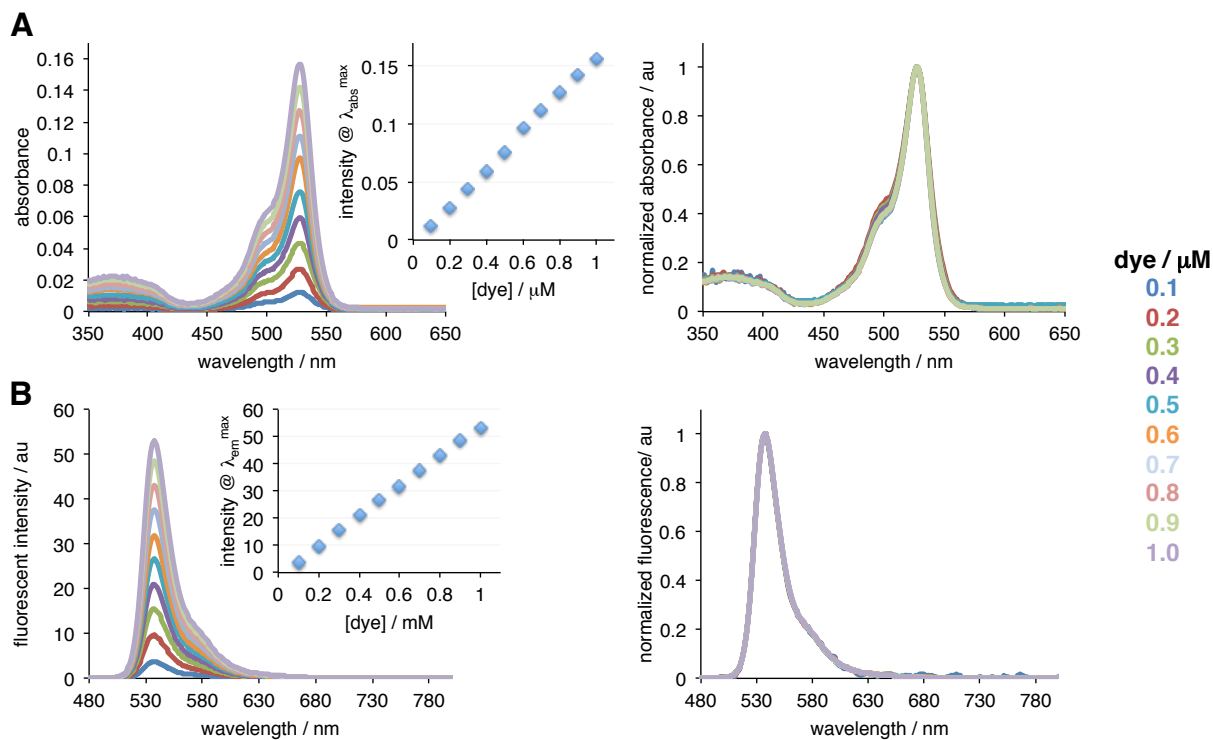

**Figure S5** Spectral properties of dye **2** in the presence of BSA.

[BSA] = 39  $\mu\text{M}$

**A:** Absorption spectra as a function of dye's concentration (left) and normalized absorption spectra as a function of dye's concentration (right);

**B:** Emission spectra as a function dye's concentration;  $\lambda_{\text{ex}} = 475 \text{ nm}$

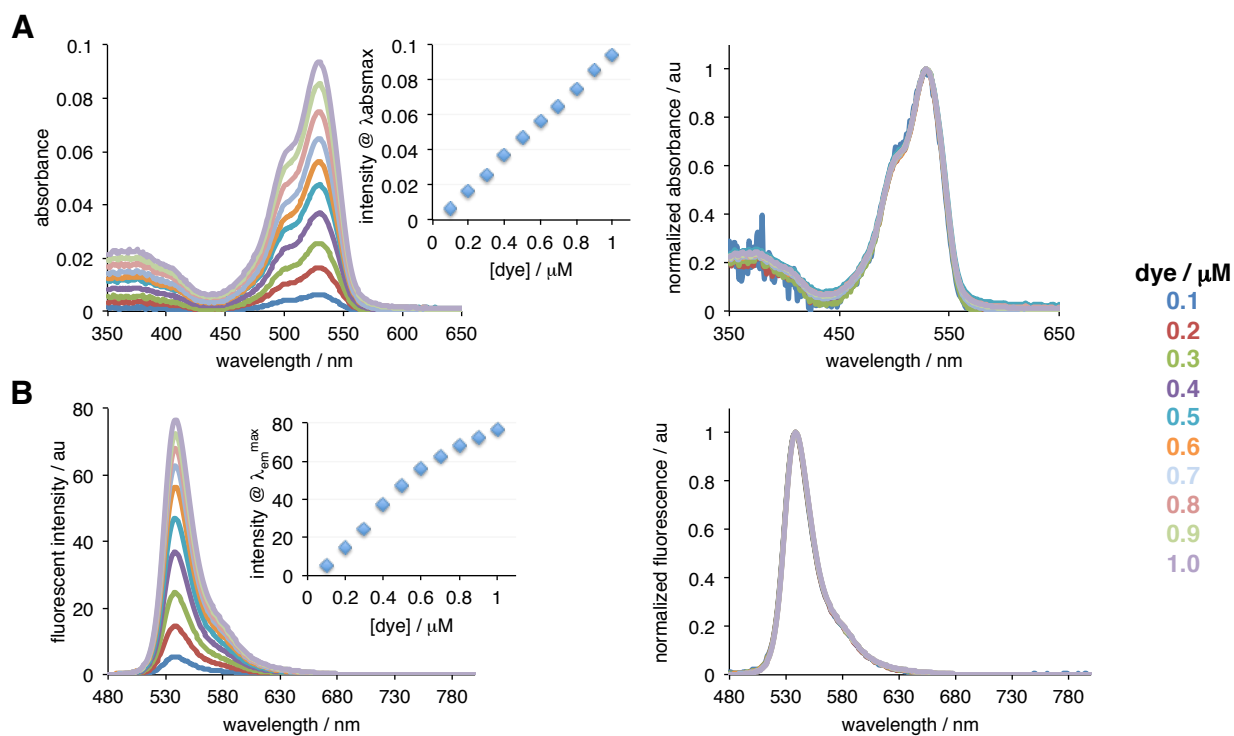

**Figure S6** Spectral properties of dye **3** in the presence of BSA.

[BSA] = 39  $\mu\text{M}$

**A:** Absorption spectra as a function of dye's concentration (left) and normalized absorption spectra as a function of dye's concentration (right);

**B:** Emission spectra as a function dye's concentration;  $\lambda_{\text{ex}} = 475 \text{ nm}$

## References

1. Y. Wang, O. Annunziata, *Langmuir* **2008**, *24*, 2799.
2. dye **1**: a) A. Haefele, G. Ulrich, P. Retailleau, R. Ziessel, *Tetrahedron Lett.*, **2008**, *49*, 3716; b) G. Ulrich, R. Ziessel, *Synlett*, **2004**, 439.
3. dye **3**: N. W. Smith, A. Alonso, C. M. Brown, S. V. Dzyuba, *Biochem. Biophys. Res. Commun.*, **2010**, *391*, 1455.
4. A. K. Feldman, B. Colasson, V. V. Fokin, *Org. Lett.* **2004**, *6*, 3897.
5. S. Mula, A. K. Ray, M. Banerjee, T. Chaudhuri, K. Dasgupta, S. Chattopadnyay, *J. Org. Chem.*, **2008**, *73*, 2146-2154
